# Supplementary material for: SERS detection of thiram using a 3D sea cucumber-like composite flexible porous substrate
Source: Royal Society of Chemistry journal article supplement (doi:10.1039/d4an00610k), 2024-01-01
Supplement: d4an00610k1.pdf [file d4an00610k1.pdf]

## Supporting Information

# SERS detection of thiram by a 3D sea cucumber-like composite flexible porous substrate

*Yimeng Shi*<sup>a, b</sup>, *Yan Zhu*<sup>b, c</sup>, *Jiaojiao Sun*<sup>b</sup>, *Huancai Yin*<sup>a, b\*</sup>, *Jian Yin*<sup>a, b\*</sup>

<sup>a</sup> School of Biomedical Engineering (Suzhou), Division of Life Sciences and Medicine, University of Science and Technology of China, Suzhou, Jiangsu 215163, PR China

<sup>b</sup> CAS Key Lab of Bio-Medical Diagnostics, Suzhou Institute of Biomedical Engineering and Technology, Chinese Academy of Sciences, Suzhou, Jiangsu 215163, PR China

<sup>c</sup> Key Laboratory of Integrated Regulation and Resource Development on Shallow Lake of Ministry of Education, College of Environment, Hohai University, Nanjing, Jiangsu 210098, PR China

### CORRESPONDING AUTHOR

\*E-mail: [yinj@sibet.ac.cn](mailto:yinj@sibet.ac.cn) (for J. Yin).

\*E-mail: [yinhc@sibet.ac.cn](mailto:yinhc@sibet.ac.cn) (for H. Yin).

## **Table of Content**

- 1. Method 1.** Calculation Method for Thiram Recovery Rate.
- 2. Figure S1.** The average Raman spectra of Au/Ag/ZnO/P under the excitation of three wavelengths.
- 3. Figure S2.** Comparison for the enhancement effects of ZnO/P, Au/ZnO/P, and Ag/Au/ZnO/P Substrates.
- 4. Figure S3.** EDS spectrum and elemental mapping of Ag/Au/ZnO/P substrate.
- 5. Figure S4.** XPS survey spectrum of the Ag/Au/ZnO/P substrate and high-resolution XPS spectra of Zn 2p, Au 4f, and Ag 3d.
- 6. Figure S5.** XRD of the Ag/Au/ZnO/P substrate.
- 7. Figure S6.** Comparison of the enhancement effects of Au/Au/ZnO/P and Au/Ag/ZnO/P Substrates.
- 8. Figure S7.** Stability evaluation of the Ag/Au/ZnO/P Substrate.
- 9. Figure S8.** The average Raman spectra of apple peel at two concentrations of 4.8 mg/cm<sup>2</sup> and 4.8 ng/cm<sup>2</sup>.
- 10. Figure S9.** Electron microscopy images of PVDF membrane and seed layer.

## 1. Calculation Method for Thiram Recovery Rate

Based on the current results, the recovery efficiency is difficult to calculate as the liquid volume on the substrate/apple peels is difficult to monitor. Therefore, we used a different method to conduct the semi-quantitative analysis. Solutions of thiram at various concentrations were sprayed onto apple peels and allowed to air dry. A 1 cm<sup>2</sup> section of the treated apple peel was then cut into small pieces, placed into a 2 mL EP tube, and immersed in 1 mL of ethanol to dissolve the thiram. The Ag/Au/ZnO/P substrate was subsequently soaked in the tube for 10 minutes, after which Raman analysis was performed. The mass of the thiram was calculated using calibration curves and 1 mL as the total volume. The recovery rate was determined by the ratio of values obtained with Raman detection and the sprayed doses. As a result, the recovery rate for a concentration of 4.8 mg/cm<sup>2</sup> was approximately 88%.

## 2. The average Raman spectra of 4-MBA on Au/Ag/ZnO/P substrate under the excitation of three wavelengths

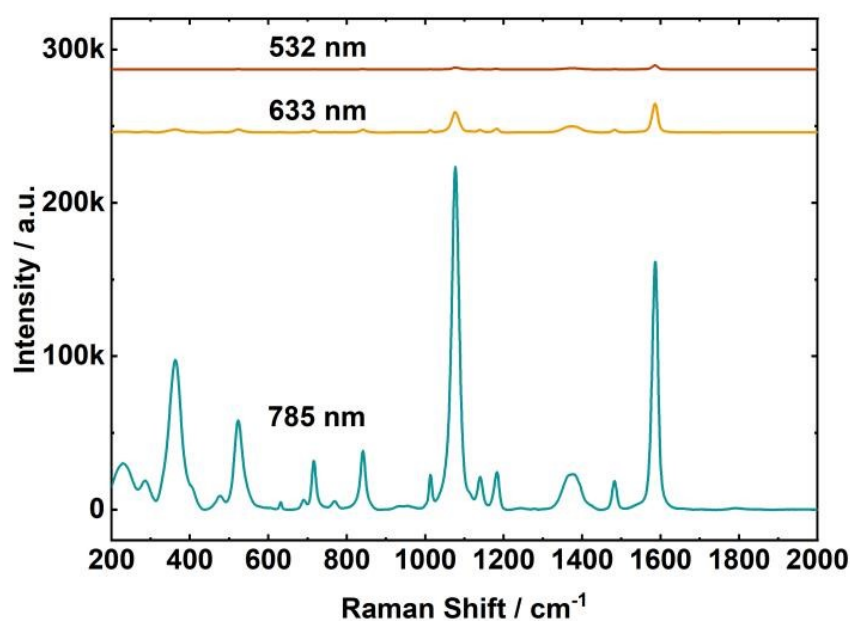

Figure S1 The average Raman spectra of 4-MBA on the Au/Ag/ZnO/P substrate under the excitation of

three wavelengths.

### 3. Comparison of the Enhancement Effects of ZnO/P, Au/ZnO/P and Ag/Au/ZnO/P

Substrates

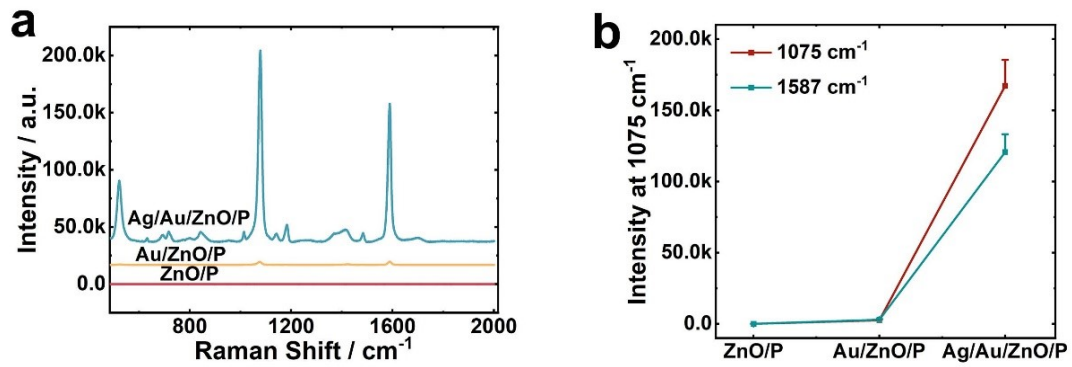

Figure S2 (a) SERS spectra of 4-MBA ( $10^{-3}$  M) on ZnO/P, Au/ZnO/P, and Ag/Au/ZnO/P substrates; (b)

Band intensities at 1075  $\text{cm}^{-1}$  and 1587  $\text{cm}^{-1}$  (laser power: 0.0001%).

### 4. EDS spectrum and elemental mapping of Ag/Au/ZnO/P substrate

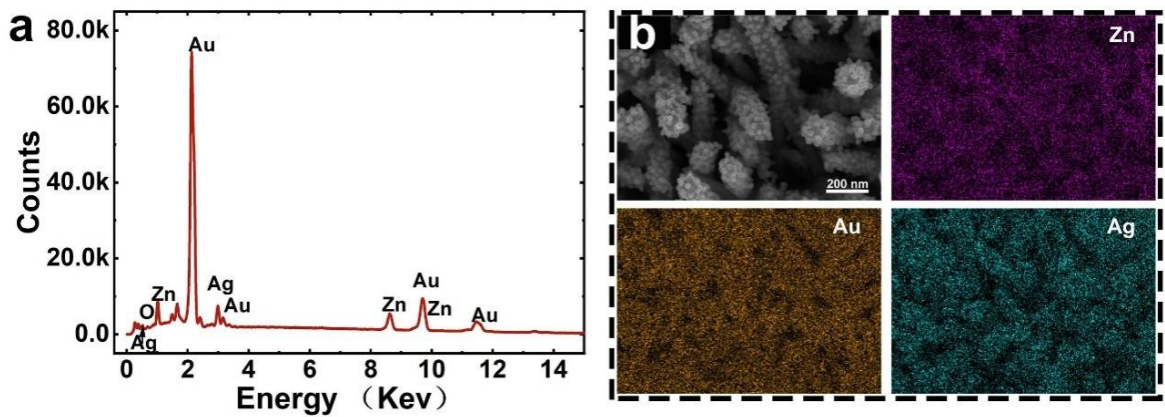

Figure S3 EDS spectrum (a) and elemental mapping (b) of Ag/Au/ZnO/P substrate.

### 5. XPS survey spectrum of the Ag/Au/ZnO/P substrate and high-resolution XPS spectra of Zn

2p, Au 4f and Ag 3d

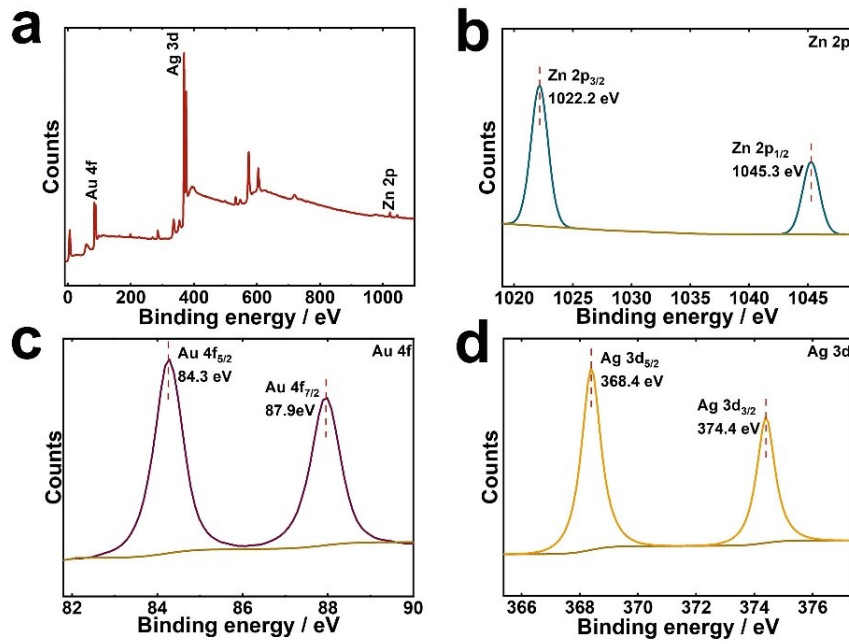

Figure S4 XPS survey spectrum of the Ag/Au/ZnO/P substrate (a) and high-resolution XPS spectra of (b) Zn 2p, (c) Au 4f, and (d) Ag 3d.

## 6. XRD analysis of the Ag/Au/ZnO/P substrate

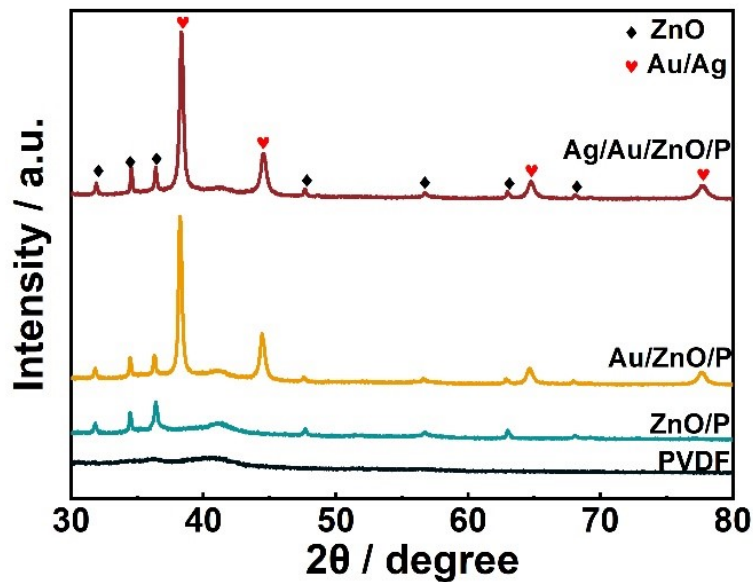

Figure S5 XRD analysis of the Ag/Au/ZnO/P substrate.

## 7. Comparison of the Enhancement Effects of Au/Au/ZnO/P and Au/Ag/ZnO/P Substrates

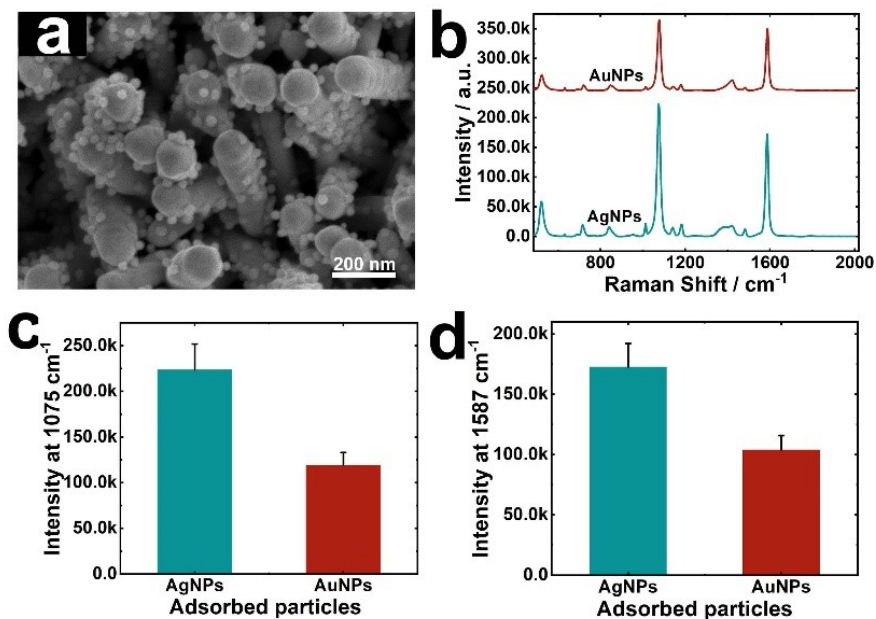

Figure S6 SEM images of (a) AuNPs adsorbed on Au/ZnO/P substrate; (b) The average Raman spectra of 4-MBA on Au/Au/ZnO/P substrate and Au/Ag/ZnO/P; (c) 1075 cm<sup>-1</sup> and (d) 1587 cm<sup>-1</sup> peaks of 10<sup>-3</sup> M 4-MBA on Ag/Au/ZnO/P and Au/Au/ZnO/P.

### 8. Stability Evaluation of the Ag/Au/ZnO/P Substrate

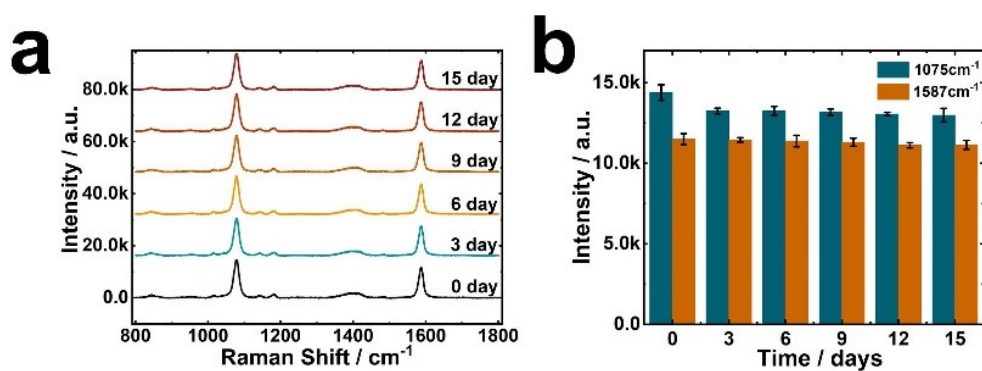

Figure S7 (a) Raman spectra of 1 × 10<sup>-6</sup> M 4-MBA using the Ag/Au/ZnO/P substrate stored over different time (laser power: 0.0001%). (b) Intensity variation histogram of 1075 cm<sup>-1</sup> and 1587 cm<sup>-1</sup> peaks.

### 9. The average Raman spectra of thiram on apple peels

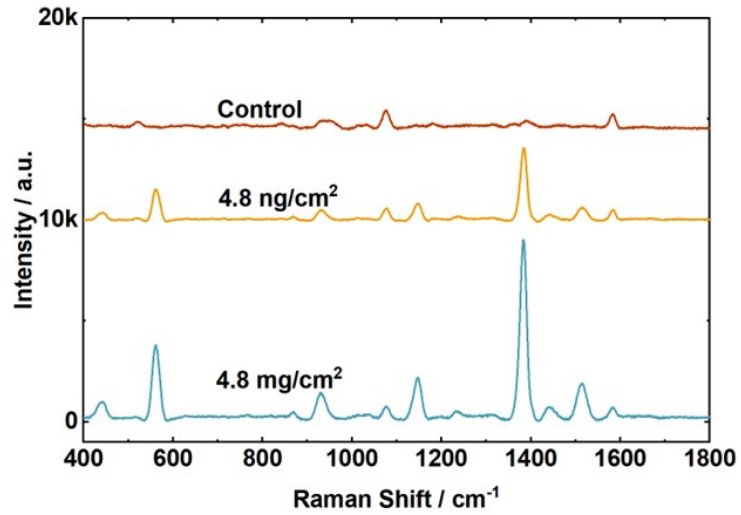

Figure S8 The average Raman spectra of thiram on apple peels. Thiram were sprayed on the peels at 4.8 mg/cm<sup>2</sup> and 4.8 ng/cm<sup>2</sup>. After that, their residue amounts on the peels were detected as described in Method 1.

#### 10. Electron microscopy images of PVDF membrane and seed layer

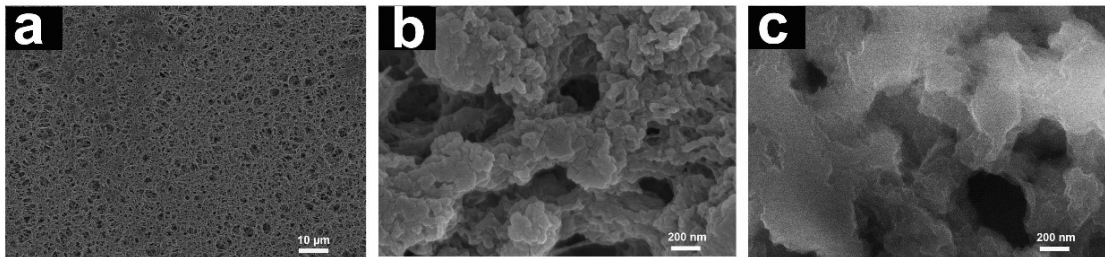

Figure S9 Electron microscopy images of PVDF membrane at magnifications of 1× (a) and 50× (b), respectively. (c) Seed layer electron microscope picture of zinc oxide growth, it is not visible under the electron microscope.
